# Supplementary material
Source: publisher figshare collection journal article supplement (https://acs.figshare.com/ndownloader/files/5976768)
Supplement: Supplementary file 1 [file 5976768]

# Supporting Information

## for

# Gyroid Optical Metamaterials: Calculating the Effective Permittivity of Multidomain Samples

James A. Dolan,<sup>†,‡</sup> Matthias Saba,<sup>¶</sup> Raphael Dehmel,<sup>‡,⊥</sup> Ilja Gunkel,<sup>§</sup> Yibei Gu,<sup>||, #</sup>  
Ulrich Wiesner,<sup>||</sup> Ortwin Hess,<sup>¶</sup> Timothy D. Wilkinson,<sup>†</sup> Jeremy J. Baumberg,<sup>‡</sup>  
Ullrich Steiner,<sup>§</sup> and Bodo D. Wilts\*,<sup>§</sup>

<sup>†</sup>*Department of Engineering, University of Cambridge, J.J. Thomson Avenue, Cambridge  
CB3 0FA, UK*

<sup>‡</sup>*Department of Physics, University of Cambridge, J.J. Thomson Avenue, Cambridge CB3  
0HE, UK*

<sup>¶</sup>*Department of Physics, Imperial College, Prince Consort Road, London SW7 2BB, UK*

<sup>§</sup>*Adolphe Merkle Institute, Chemin des Verdiers 4, 1700 Fribourg, Switzerland*

<sup>||</sup>*Department of Materials Science and Engineering, Cornell University, 214 Bard Hall,  
Ithaca, NY 14853-1501, USA*

<sup>⊥</sup>*Current Address: Papierfabrik Louisenenthal GmbH, 83701 Gmund a.T. Germany*

<sup>#</sup>*Current Address: The Dow Chemical Company, 2301 N. Brazosport Blvd, Freeport, TX  
77541, USA*

E-mail: bodo.wilts@unifr.ch

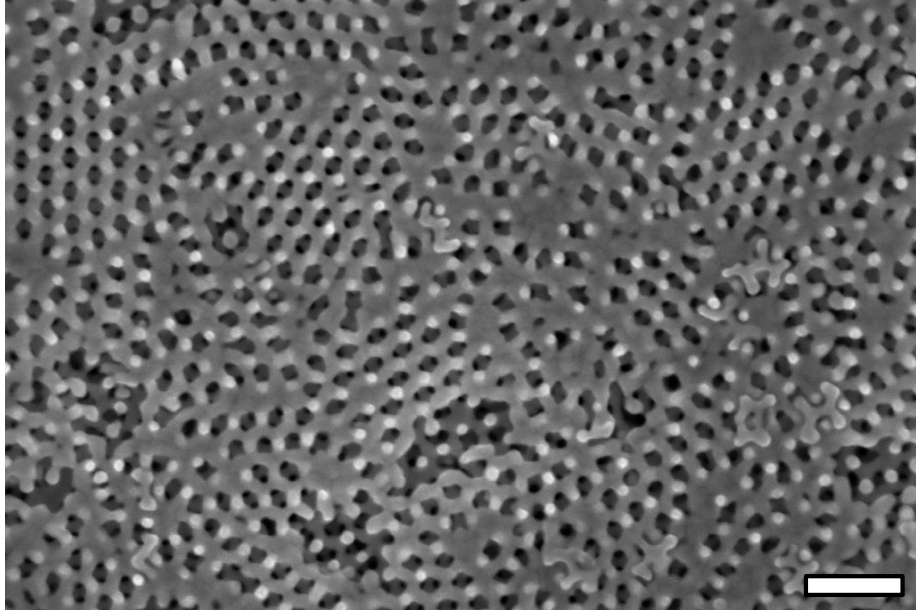

Figure S1: **Small gyroid metamaterial domains.** Electron micrograph of gold gyroid metamaterial sample (top view) highlighting the small size and random orientation of the domains (scale bar: 200 nm).

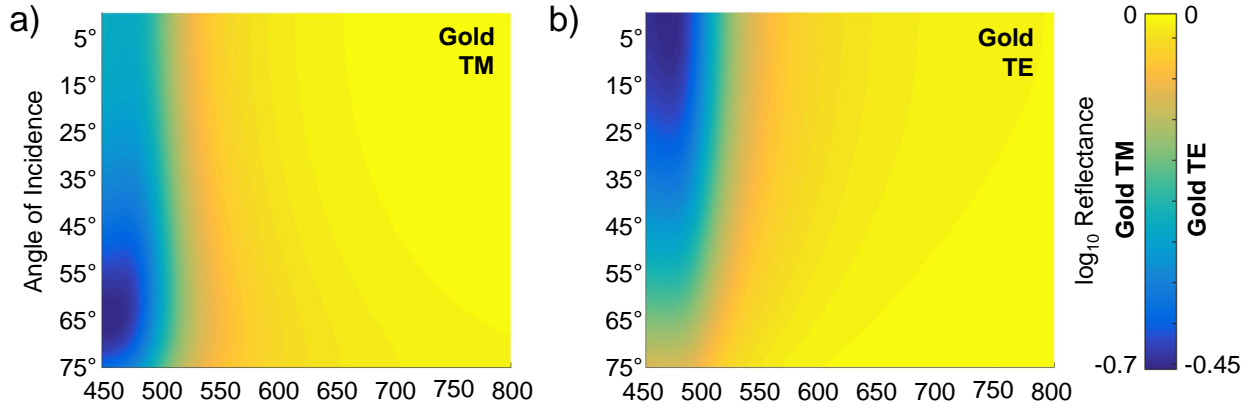

Figure S2: **Reflectance spectra of pure gold.** a) Reflectance spectra of pure gold as a function of angle of incidence calculated from  $\epsilon_{\text{Au}}(\omega)$  for transverse magnetic (TM) polarized light (log colour scale extends from  $-0.7$  to  $0$ ). Tabulated data for the permittivity of bulk gold is that found in Olmon et al<sup>1</sup>. b) The same for transverse electric (TE) polarized light (log colour scale extends from  $-0.4$  to  $0$ ).

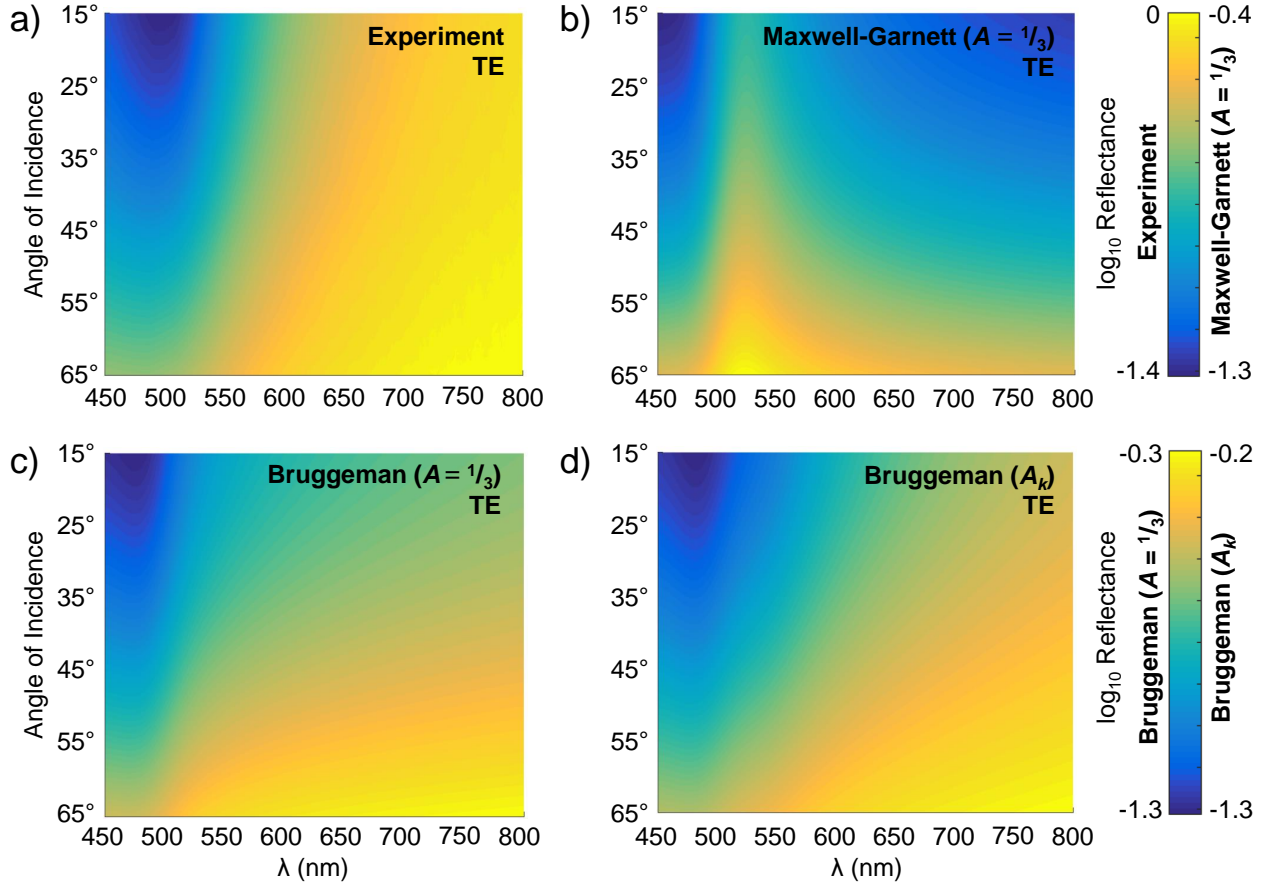

Figure S3: **Comparison of measured and modelled TE reflectance spectra as a function of angle of incidence using three effective medium theories.** a) The measured reflectance spectra for transverse electric (TE) polarized light (log colour scale extends from  $-1.4$  to  $0$ ). b) The reflectance spectra generated using the Maxwell-Garnett theory (log colour scale extends from  $-1.3$  to  $-0.45$ ). c) The same generated using the Bruggeman theory and  $A = 1/3$ , i.e. spherical inclusions (log colour scale extends from  $-1.3$  to  $-0.3$ ). d) The same generated using the Bruggeman theory and  $A_1 = 0.66$ ,  $A_2 = 0.34$  and  $A_3 = 0$ , i.e. ellipsoidal inclusions (log colour scale extends from  $-1.3$  to  $-0.2$ ).

## Bruggeman Effective Medium Theory

We here present a brief derivation of Equation 3 in the main manuscript. Consider the effective permittivity  $\bar{\varepsilon} : \mathcal{V} \rightarrow \text{GL}(2, \mathbb{C})$  of a homogenised metamaterial within a domain  $\mathcal{V} \in \mathbb{R}^3$  with volume  $V$  defined by the equation

$$\langle \vec{D} \rangle = \bar{\varepsilon} \langle \vec{E} \rangle , \quad (1)$$

where  $\langle f(\vec{r}) \rangle = \int_{\mathcal{V}} d^3r f(\vec{r})/V$  is the volume average, and the electric field  $\vec{E}$  and the displacement field  $\vec{D} := \varepsilon \vec{E}$  are considered functions  $\mathcal{V} \rightarrow \mathbb{C}^3$ . Further assume that the local permittivity  $\varepsilon(\vec{r})$  is piecewise constant, that is it takes the value  $\varepsilon_n$  within a subdomain  $\mathcal{V}_n \subset V$  ( $\mathcal{V} = \sum_n \mathcal{V}_n$ ,  $i = 1, 2, \dots, N$ ).

A short calculation reveals that

$$\langle D_i \rangle = \sum_n \varepsilon_n f_n \langle E_i \rangle_n ,$$

where we take some vector component  $D_i$  of  $\vec{D}$ ,  $\langle \cdot \rangle_n$  denotes the average over  $\mathcal{V}_n$ , and  $f_n = V_n/V$  is the fill fraction of the respective subregion. Substitution into Equation 1 thus yield a general expression for the effective permittivity:

$$\bar{\varepsilon}_{ij} = \sum_n \varepsilon_n f_n \frac{\langle E_i \rangle_n}{\langle E_j \rangle} = \sum_n (\varepsilon_n - \varepsilon_m) f_n \frac{\langle E_i \rangle_n}{\langle E_j \rangle} + \varepsilon_m \delta_{ij} . \quad (2)$$

For a two-component system, this is evidently equivalent to

$$(\bar{\varepsilon} - \varepsilon_1) f_1 \frac{\langle E_i \rangle_1}{\langle E_j \rangle} + (\bar{\varepsilon} - \varepsilon_2) f_2 \frac{\langle E_i \rangle_2}{\langle E_j \rangle} = 0 . \quad (3)$$

This equation is exact. However, the contribution of the average field in domain  $n$  to the total average is unknown. In the following, three approximations are made:

- that all single connected regions within each subdomain are small compared to the

effective wavelength, i.e. each diameter  $d$  satisfies  $\lambda_0 \gg \bar{\epsilon}d$ , where  $\lambda_0$  is the vacuum wavelength of the light,

- that the domains are small compared to the system size, i.e.  $V$  is large compared to  $d$  in any direction of space,
- and that all subdomains can be replaced by a monodisperse arrangement of ellipsoids of arbitrary direction.

We note that these assumptions are both in contradiction to the gyroid metamaterial geometry which is comprised of two interpenetrating domains of infinite extend, and can never truly be realised any physically realistic geometry. The resulting effective medium equation is nevertheless widely applied and provides the necessary degrees of freedom to provide a reasonable fit to our experimental data.

Consider a single closed subdomain of region 1 of ellipsoidal shape, embedded within the metamaterial of permittivity  $\bar{\epsilon}$ . Further assume that the average field  $\langle E_i \rangle$  is given and due to the dimension mismatch can be used as a boundary condition at infinity for  $V \rightarrow \mathbb{R}^3$ . The corresponding electric field in the inclusion can be found analytically using the static Maxwell equations<sup>2</sup>:

$$\frac{E_k}{\langle E_k \rangle} = \frac{1}{1 + (\epsilon_1/\bar{\epsilon} - 1) A_k} .$$

Here,  $k$  labels the principal axes of the ellipsoid and  $A_k$  is the depolarisation factor defined in Equation 2. Converting this equation to an arbitrarily oriented ellipsoid (labelled  $s$ ) with respect to the global coordinate system yields

$$\frac{E_{i,s}}{\langle E_j \rangle} = \sum_{k_s} \frac{\cos(\phi_{ik_s}) \cos(\phi_{k_sj})}{1 + (\epsilon_1/\bar{\epsilon} - 1) A_{k_s}} , \quad (4)$$

where angle  $\phi_{ij}$  is the angle between the two axes  $i$  and  $j$ . For randomly oriented ellipsoids (i.e. assuming a uniform distribution of angles) we can now calculate the average field in

domain 1 as

$$\frac{\langle E_i \rangle_1}{\langle E_j \rangle} = \frac{1}{N_s} \sum_s \sum_{k_s} \frac{\cos(\phi_{ik_s}) \cos(\phi_{k_s j})}{1 + (\varepsilon_1/\bar{\varepsilon} - 1) A_k} \approx \frac{\delta_{ij}}{2} \sum_k \frac{1}{1 + (\varepsilon_1/\bar{\varepsilon} - 1) A_k}. \quad (5)$$

In the last step, we approximated the sum over all inclusions by an integral. This is possible because the number of single inclusions  $N_s$  is large; a consequence of the second approximation above. Following the same procedure for domain 2 and substituting Equation 5 into Equation 3 yields Equation 3 in the main manuscript where  $\bar{\varepsilon}$  is denoted  $\varepsilon_{\text{eff}}$ .

## References

- (1) Olmon, R. L.; Slovick, B.; Johnson, T. W.; Shelton, D.; Oh, S.-H.; Boreman, G. D.; Raschke, M. B. Optical dielectric function of gold. *Phys. Rev. B* **2012**, *86*, 235147.
- (2) Stratton, J. A. *Electromagnetic Theory*; John Wiley & Sons, 2007.
